# Efficacy of apixaban when compared with warfarin in relation to renal function in patients with atrial fibrillation: insights from the ARISTOTLE trial

**Stefan H. Hohnloser<sup>1\*</sup>, Ziad Hijazi<sup>2,3</sup>, Laine Thomas<sup>4</sup>, John H. Alexander<sup>4</sup>, John Amerena<sup>5</sup>, Michael Hanna<sup>6</sup>, Matyas Keltai<sup>7</sup>, Fernando Lanas<sup>8</sup>, Renato D. Lopes<sup>4</sup>, Jose Lopez-Sendon<sup>9</sup>, Christopher B. Granger<sup>4</sup>, and Lars Wallentin<sup>2</sup>**

<sup>1</sup>Division of Clinical Electrophysiology, Department of Cardiology, J.W. Goethe University, Theodor-Stern-Kai 7, Frankfurt D 60590, Germany; <sup>2</sup>Uppsala Clinical Research Center, Uppsala University, Uppsala, Sweden; <sup>3</sup>Department of Medical Sciences, Cardiology, Uppsala University, Uppsala, Sweden; <sup>4</sup>Duke Clinical Research Institute, Duke University Medical Center, Durham, NC, USA; <sup>5</sup>Geelong Cardiology Research Center, Deakin University, Victoria, Australia; <sup>6</sup>Bristol-Myers Squibb, Princeton, NJ, USA; <sup>7</sup>Hungarian Institute of Cardiology, Semmelweis University, Budapest, Hungary; <sup>8</sup>Universidad de La Frontera, Temuco, Chile; and <sup>9</sup>Hospital Universitario La Paz, Madrid, Spain

Received 12 July 2012; revised 30 July 2012; accepted 2 August 2012; online publish-ahead-of-print 29 August 2012

See page 2766 for the editorial comment on this article (doi:10.1093/eurheartj/ehs267)

## Aims

Atrial fibrillation (AF) is common among patients with impaired renal function. Apixaban, a novel oral anticoagulant with partial renal excretion, was compared with warfarin and reduced the rate stroke, death and bleeding in the ARISTOTLE trial. We evaluated these outcomes in relation to renal function.

## Methods and results

Baseline glomerular filtration rate (GFR) was estimated using the Cockcroft–Gault and Chronic Kidney Disease Epidemiology Collaboration (CKD-EPI) equations as well as cystatin C measurements. According to baseline Cockcroft–Gault, there were 7518 patients (42%) with an estimated GFR (eGFR) of >80 mL/min, 7587 (42%) between >50 and 80 mL/min, and 3017 (15%) with an eGFR of ≤50 mL/min. The rate of cardiovascular events and bleeding was higher at impaired renal function (≤80 mL/min). Apixaban was more effective than warfarin in preventing stroke or systemic embolism and reducing mortality irrespective of renal function. These results were consistent, regardless of methods for GFR estimation. Apixaban was associated with less major bleeding events across all ranges of eGFRs. The relative risk reduction in major bleeding was greater in patients with an eGFR of ≤50 mL/min using Cockcroft–Gault [hazard ratio (HR) 0.50 [95% confidence interval (CI) 0.38–0.66], interaction  $P = 0.005$ ] or CKD-EPI equations [HR 0.48 (95% CI 0.37–0.64), interaction  $P = 0.003$ ].

## Conclusion

In patients with AF, renal impairment was associated with increased risk of cardiovascular events and bleeding. When compared with warfarin, apixaban treatment reduced the rate of stroke, death, and major bleeding, regardless of renal function. Patients with impaired renal function seemed to have the greatest reduction in major bleeding with apixaban.

## Keywords

Atrial fibrillation • Anticoagulation • Stroke prevention • Bleeding • Apixaban

## Introduction

Chronic kidney disease affects up to 10% of the adult population, particularly the elderly,<sup>1</sup> and carries a high risk for cardiovascular disease, including atrial fibrillation (AF).<sup>2</sup> In a large population-based

long-term follow-up study with impaired renal function, the hazard ratio (HR) for the development of AF more than doubled in patients with an estimated glomerular filtration rate (GFR) of 15–29 mL/min compared with patients with normal renal function independent from other known risk factors for AF.<sup>3</sup> Whereas it is well appreciated

\* Corresponding author: Tel: +49 69 6301 7404; Fax: +49 69 6301 7017; Email: hohnloser@em.uni-frankfurt.de

Published on behalf of the European Society of Cardiology. All rights reserved. © The Author 2012. For permissions please email: journals.permissions@oup.com

that stroke risk in end-stage renal disease is elevated,<sup>4</sup> the importance of renal dysfunction as an independent risk factor for AF-associated thrombo-embolic events is more controversial. However, some studies indicate that a lower level of eGFR is associated with a graded, increased risk of ischaemic stroke or systemic embolism.<sup>5</sup> Despite this increased risk for AF-associated thrombo-embolism, many patients with renal dysfunction are not receiving oral anticoagulation therapy,<sup>6</sup> mostly because of fear of bleeding with warfarin.<sup>7</sup>

Apixaban is a novel factor Xa inhibitor with good oral bioavailability and only ~25% renal elimination. In the Apixaban for Reduction In STroke and Other Thromboembolic Events in atrial fibrillation (ARISTOTLE) trial, apixaban, when compared with warfarin, was associated with a 21% relative risk reduction in stroke or systemic embolism, a 11% reduction in total mortality, and a 31% reduction in major bleeds in patients with AF and at least one additional risk factor for stroke.<sup>8,9</sup> Because of the limited renal elimination, the protocol predefined an assessment of the efficacy and safety of apixaban in patients with various degrees of renal dysfunction. For this pre-specified secondary analysis, we used the Cockcroft–Gault method to estimate renal function but also the Chronic Kidney Disease Epidemiology Collaboration (CKD-EPI), a new equation for the estimation of GFR which was specifically developed to outperform existing creatinine-based GFR estimates with respect to estimating true GFR.<sup>10</sup> As a third method, we used cystatin C which has been proposed to be a more reliable marker of renal function than serum creatinine.<sup>11</sup>

## Methods

### Patient population

Ethics committee approval was obtained for all investigational sites, and all patients provided written informed consent. To be eligible in ARISTOTLE, patients had to have AF or flutter at enrolment or at least two episodes of AF or flutter documented by electrocardiography at least 2 weeks apart in the 12 months before enrolment. In addition, at least one of the following risk factors for stroke was required: age  $\geq 75$  years; prior stroke, transient ischaemic attack, or systemic embolism; symptomatic heart failure within 3 months or left ventricular ejection fraction of no more than 40%; diabetes mellitus; hypertension requiring pharmacological treatment. Major exclusion criteria included AF due to a reversible cause, moderate or severe mitral stenosis, conditions other than AF that required anticoagulation such as prosthetic heart valve, stroke within 7 days, need for aspirin  $>165$  mg a day or both aspirin and clopidogrel, and severe renal insufficiency [serum creatinine  $>2.5$  mg/dL (221  $\mu$ mol/L) or calculated creatinine clearance  $<25$  mL/min].<sup>9</sup>

### Trial design and outcome measures

The design of ARISTOTLE has been published.<sup>9</sup> In brief, eligible patients were randomly assigned to receive apixaban or dose-adjusted warfarin using a double-blind, double-dummy design. Apixaban (or matching placebo) was dosed at 5 mg twice daily or 2.5 mg twice daily for a subset of patients with two or more of the following criteria: age  $\geq 80$  years, body weight  $\leq 60$  kg, serum creatinine  $\geq 1.5$  mg/dL (133  $\mu$ mol/L). Warfarin (or matching placebo) was provided as 2 mg tablets adjusted to achieve a target international normalized ratio (INR) of 2.0–3.0. International normalized ratios were monitored

using a blinded, encrypted point-of-care INR device and an algorithm was provided to guide warfarin dose adjustment.

The primary efficacy endpoint in ARISTOTLE was stroke (ischaemic or haemorrhagic) or systemic embolism. The primary safety outcome was International Society of Thrombosis and Hemostasis (ISTH) major bleeding. Major bleeding was defined as acute or subacute clinically overt bleeding accompanied by one or more of the following: (i) a decrease in the haemoglobin level of  $\geq 2$  g/dL over a 24 h period; (ii) a transfusion of  $\geq 2$  U of packed red blood cells; and/or (iii) bleeding that is fatal or occurs in at least one of the following critical sites: intracranial, intraspinal, intraocular, pericardial, intraarticular, intramuscular with compartment syndrome, retroperitoneal.<sup>9</sup> A blinded clinical events committee adjudicated all primary and secondary (all-cause deaths, myocardial infarction) outcomes according to pre-specified criteria.

### Laboratory methods

At the time of randomization, before initiation of study treatment, a venous EDTA blood sample was drawn for the determination of creatinine and cystatin C levels. The blood was centrifuged, thereafter immediately frozen at  $-20^{\circ}\text{C}$  or colder. Aliquots were stored at  $-70^{\circ}\text{C}$  to allow batch analysis. Plasma creatinine measurements were performed in a core laboratory using a Roche Modular analyzer with a kinetic colorimetric compensated Jaffe assay (Roche Modular, Meylan, France). Cystatin C was centrally analysed in Uppsala Clinical Research Center (UCR)—laboratory, Sweden, with the Architect system ci8200 (Abbott Laboratories, Abbott Park, IL, USA) using the particle enhanced turbidimetric immunoassay (PETIA) from Gentian (Gentian, Moss, Norway). The lowest limit of detection is 0.05 mg/L according to the manufacturer. The total analytical imprecision of the method is 1.09% at 0.85 mg/L and 1.03% at 3.06 mg/L.<sup>12</sup> The upper reference level, defined as the 97.5th percentile value in an apparently healthy population, is 1.21 mg/L for those who are  $>65$  years.<sup>13</sup>

### Glomerular filtration rate estimation

The Cockcroft–Gault GFR was derived from the following equation:  $(140 - \text{age}) \times (\text{weight in kg}) \times (0.85 \text{ if female}) / (72 \times \text{Cr in mg/dL})$ . CKD-EPI GFR was derived from the following equation<sup>9</sup>:  $\text{GFR (mL/min/1.73 m}^2) = 141 \times \min(\text{Scr}/\kappa, 1)^{\alpha} \times \max(\text{Scr}/\kappa, 1)^{-1.209} \times 0.993^{\text{Age}} \times 1.018 \text{ (if female)} \times 1.159 \text{ (if black)}$ , where  $\kappa$  is 0.7 for females and 0.9 for males,  $\alpha$  is  $-0.329$  for females and  $-0.411$  for males, min indicates the minimum of  $\text{Scr}/\kappa$  or 1, max indicates the maximum of  $\text{Scr}/\kappa$  or 1, and Scr is expressed in mg/dL. Glomerular filtration rate in mL/min/1.73 m<sup>2</sup> was also estimated from serum cystatin C results in mg/L by the formula  $y = 79.901 \times \text{cystatin C}^{-1.4389}$ .

### Statistical analyses

For the purpose of this pre-specified secondary analysis of ARISTOTLE, patients' GFR was estimated according to the three different methods. The Cockcroft–Gault and CKD-EPI were calculated with creatinine at randomization, and cystatin C eGFR with cystatin C levels at randomization. Patients were classified according to the main trial pre-specified cut-offs and estimated GFR (eGFR) of  $>80$ ,  $>50$ –80, and  $\leq 50$  mL/min. We examined the baseline characteristics of patients by categories of renal function. Continuous variables are presented as means and standard deviation (SD), with between-group comparisons, tested by ANOVA for normally distributed data and non-parametric (Kruskal–Wallis) tests otherwise. Categorical variables are presented as counts and percentages and compared by  $\chi^2$  tests or Fisher's exact tests, where appropriate.

Primary and secondary efficacy analyses included all randomized patients (intention-to-treat) and included all events from randomization

until the efficacy cut-off date (predefined as 30 January 2011). Bleeding analyses were 'on treatment' including all randomized patients who received at least one dose of the study drug and included all events from receipt of the study drug until 2 days after the last dose of the study drug. Event rates per 100 patient-years of follow-up are reported. Hazard ratios [95% confidence intervals (CI)] comparing apixaban with warfarin were derived from the Cox proportional hazards models. Treatment effects were compared according to renal function, both as a categorical variable and continuous measures, by adding interactions to the model. We report the treatment HRs at varying levels of renal function, regardless of the significance of interaction. Restricted cubic splines were used to allow for non-linearity in the relationship between continuous renal function and outcomes. Interactions with continuous renal function were illustrated by plotting the estimated probability of 1-year events, according to the continuous level of renal function, with separate curves for each treatment group. All analyses were performed using SAS software, version 9.1 (SAS Institute Inc., Cary, NC, USA). A two-sided  $P$ -value of  $<0.05$  was considered statistically significant.

## Results

### Patient characteristics

According to the Cockcroft–Gault, a total of 7518 patients (42%) were classified according to their baseline eGFR as having a renal function of  $>80$  mL/min, 7587 (42%) having an eGFR of  $>50$ – $80$  mL/min, and 3017 (15%) having an eGFR of  $\leq 50$  mL/min. According to CKD-EPI, 5190 (29%), 10 151 (56%), and 2843 (16%) patients were classified according to the eGFR of  $>80$ ,  $>50$ – $80$ , and  $\leq 50$  mL/min, respectively. Cystatin C was available in 14 884 patients as part of a biomarker substudy, and 7545 (51%), 5272 (35%) and 2067 (14%) patients were classified according to the eGFR of  $>80$ ,  $>50$ – $80$ , and  $\leq 50$  mL/min, respectively. *Tables 1 and 2* show baseline characteristics of patients over all ranges of renal dysfunction. According to renal function classifications, there was an inverse relationship between co-morbidities, stroke risk factors, or the presence of non-paroxysmal AF and decreasing renal function.

### Outcomes according to renal dysfunction

Patients with impaired renal function ( $\leq 80$  mL/min) were at higher risk for all cardiovascular events during the trial. For instance, the annualized stroke rate was 1.05% in patients with an eGFR of  $>80$  mL/min, 1.46% in patients with an eGFR of  $>50$ – $80$  mL/min, and 2.39% in patients with an eGFR of  $\leq 50$  mL/min according to the Cockcroft–Gault equation. The annual ischaemic stroke rate in patients with an eGFR of  $\leq 50$  mL/min more than doubled that of patients with normal renal function (0.76 vs. 1.70%). All-cause mortality was three times higher in patients with an eGFR of  $\leq 50$  mL/min than in subjects with an eGFR of  $>80$  mL/min (2.52 vs. 7.71%).

Similarly, the incidence of major bleeding increased significantly with increasing renal dysfunction (1.65 vs. 4.80%). The associations between decreased kidney function and increased incidence of cardiovascular events were consistent utilizing all three methods of GFR estimation.

## Efficacy of apixaban vs. warfarin in patients with renal dysfunction

The superiority of apixaban relative to warfarin for preventing stroke or systemic embolism was consistent, irrespective of degree of renal impairment (*Figure 1*). There were also consistent effects without any significant interactions between treatment effects and renal dysfunction with respect to ischaemic strokes, all-cause mortality, or composite outcome events. The rates of stroke or systemic embolism were also evaluated with eGFR as a continuous variable. As demonstrated in *Figure 2*, apixaban was generally superior to warfarin in preventing primary outcome events across the range of eGFR with no significant interaction between the treatment effect and the level of renal dysfunction. The results were consistent across the Cockcroft–Gault, CKD-EPI, or cystatin C methods of estimation of GFR. Data on ischaemic vs. haemorrhagic stroke related to renal function are shown in the Supplementary material online, *Table S1*.

## Safety of apixaban vs. warfarin in patients with renal dysfunction

The incidence of major bleeding events (primary safety outcome) was inversely related to renal function, as described above. For the full range of eGFR and across all categories of renal dysfunction, apixaban was associated with less major bleeding compared with warfarin for all three methods of GFR estimation (*Figure 1*). Bleeding rates were also evaluated with eGFR as a continuous variable using Cockcroft–Gault, CKD-EPI and cystatin C. With Cockcroft–Gault, the relative reduction in major bleeding with apixaban compared with warfarin was significantly greater in patients with an eGFR of  $\leq 50$  mL/min with HR (95% confidence interval) of 0.50 (0.38–0.66) ( $P$ -value for interaction 0.005; *Figure 3A*). Estimating renal function with CKD-EPI showed similar results with a larger reduction in major bleeding in patients with an eGFR of  $\leq 50$  mL/min with HR 0.48 (0.37–0.64) ( $P$ -value for interaction 0.003; *Figure 3B*). When using cystatin C to estimate GFR, apixaban was associated with less bleeding events across all ranges of eGFR, but without any significant interaction with the treatment effect on major bleeding ( $P$ -value for interaction 0.54; *Figure 3C*).

To examine whether the reduction in bleeding in patients with impaired renal function was due to the more frequent use of the lower apixaban dose (2.5 mg bid), two sensitivity analyses were conducted. First, adjusting for dose (low/standard) by including it as a covariate, both as a main effect and as an interaction between dose and treatment (*Table 3: Sensitivity 1*). Secondly, by excluding all patients on low-dose apixaban and repeating the analysis, only in the patients on standard dose (*Table 3: Sensitivity 2*). In both sensitivity analyses, the interaction between treatment and renal function remained statistically significant for major bleeding, although less significant. This difference is mainly explained by the loss of power from excluding a large proportion of patients with low renal function.

**Table 1** Clinical characteristics and medications at the baseline according to renal function by Cockcroft–Gault

| Characteristic                                   | >80 mL/min<br>(n = 7518; 41%) | >50–80 mL/min<br>(n = 7587; 42%) | ≤50 mL/min<br>(n = 3017; 17%) | P-value |
|--------------------------------------------------|-------------------------------|----------------------------------|-------------------------------|---------|
| Low apixaban dose                                | 1 (0.0%)                      | 96 (1.3%)                        | 733 (24.3%)                   | <0.0001 |
| Age (mean, SD)                                   | 62.9 (8.6)                    | 71.8 (7.5)                       | 77.6 (7.1)                    | <0.0001 |
| Age ≥75                                          | 597 (7.9%)                    | 2922 (38.5%)                     | 2128 (70.5%)                  | <0.0001 |
| Female sex                                       | 1938 (25.8%)                  | 2837 (37.4%)                     | 1609 (53.3%)                  | <0.0001 |
| Region                                           |                               |                                  |                               |         |
| North America                                    | 2007 (26.7%)                  | 1697 (22.4%)                     | 754 (25.0%)                   | <0.0001 |
| Latin America                                    | 1269 (16.9%)                  | 1503 (19.8%)                     | 685 (22.7%)                   |         |
| Europe                                           | 3447 (45.8%)                  | 2985 (39.3%)                     | 870 (28.8%)                   |         |
| Asian Pacific                                    | 795 (10.6%)                   | 1402 (18.5%)                     | 708 (23.5%)                   |         |
| Systolic blood pressure (mean, SD)               | 131.8 (15.7)                  | 131.6 (16.8)                     | 129.5 (17.0)                  | <0.0001 |
| Diastolic blood pressure (mean, SD)              | 81.0 (10.0)                   | 78.7 (10.5)                      | 75.8 (10.9)                   | <0.0001 |
| Weight (mean, SD)                                | 97.4 (20.2)                   | 77.8 (14.2)                      | 66.3 (13.7)                   | <0.0001 |
| Prior myocardial infarction                      | 958 (12.7%)                   | 1106 (14.6%)                     | 514 (17.1%)                   | <0.0001 |
| Congestive heart failure                         | 2300 (30.6%)                  | 2236 (29.5%)                     | 988 (32.7%)                   | 0.0041  |
| Prior stroke, TIA, or systemic embolism          | 1124 (15.0%)                  | 1639 (21.6%)                     | 756 (25.1%)                   | <0.0001 |
| Diabetes                                         | 2157 (28.7%)                  | 1738 (22.9%)                     | 638 (21.1%)                   | <0.0001 |
| Hypertension                                     | 6739 (89.6%)                  | 6555 (86.4%)                     | 2560 (84.9%)                  | <0.0001 |
| Prior clinically relevant or spont. bleeding     | 1177 (15.7%)                  | 1257 (16.6%)                     | 598 (19.8%)                   | <0.0001 |
| History of fall within previous year             | 249 (3.7%)                    | 328 (4.8%)                       | 172 (6.2%)                    | <0.0001 |
| Type of atrial fibrillation                      |                               |                                  |                               |         |
| Paroxysmal                                       | 1235 (16.4%)                  | 1142 (15.1%)                     | 396 (13.1%)                   | <0.0001 |
| Persistent or permanent                          | 6281 (83.6%)                  | 6444 (84.9%)                     | 2621 (86.9%)                  |         |
| Vitamin K antagonist naïve                       | 3127 (41.6%)                  | 3253 (42.9%)                     | 1376 (45.6%)                  | 0.0008  |
| CHADS <sub>2</sub> (mean, SD)                    | 1.9 (1.0)                     | 2.2 (1.1)                        | 2.6 (1.2)                     | <0.0001 |
| CHADS <sub>2</sub> score                         |                               |                                  |                               |         |
| 1                                                | 3262 (43.4%)                  | 2391 (31.5%)                     | 503 (16.7%)                   | <0.0001 |
| 2                                                | 2662 (35.4%)                  | 2678 (35.3%)                     | 1144 (37.9%)                  |         |
| ≥3                                               | 1594 (21.2%)                  | 2518 (33.2%)                     | 1370 (45.4%)                  |         |
| CHA <sub>2</sub> DS <sub>2</sub> VASC (mean, SD) | 2.8 (1.3)                     | 3.7 (1.4)                        | 4.4 (1.4)                     | <0.0001 |
| CHA <sub>2</sub> DS <sub>2</sub> VASC score      |                               |                                  |                               |         |
| 1                                                | 1269 (16.9%)                  | 304 (4.0%)                       | 23 (0.8%)                     | <0.0001 |
| 2                                                | 2247 (29.9%)                  | 1303 (17.2%)                     | 202 (6.7%)                    |         |
| ≥3                                               | 4002 (53.2%)                  | 5980 (78.8%)                     | 2792 (92.5%)                  |         |
| HASBLED (mean, SD)                               | 1.6 (1.0)                     | 2.0 (1.0)                        | 2.2 (1.0)                     | <0.0001 |
| HASBLED 0–2                                      | 6101 (81.2%)                  | 5324 (70.2%)                     | 1993 (66.1%)                  |         |
| HASBLED ≥3                                       | 1417 (18.8%)                  | 2263 (29.8%)                     | 1024 (33.9%)                  |         |
| Medications at time of randomization             |                               |                                  |                               |         |
| ACE inhibitor or ARB                             | 5510 (74.5%)                  | 5258 (70.4%)                     | 2015 (67.7%)                  | <0.0001 |
| Amiodarone                                       | 818 (11.1%)                   | 840 (11.3%)                      | 389 (13.1%)                   | 0.0108  |
| β-Blocker                                        | 4986 (67.4%)                  | 4694 (62.9%)                     | 1761 (59.2%)                  | <0.0001 |
| Aspirin                                          | 2266 (30.1%)                  | 2369 (31.2%)                     | 977 (32.4%)                   | 0.0651  |
| Clopidogrel                                      | 98 (1.3%)                     | 150 (2.0%)                       | 89 (2.9%)                     | <0.0001 |
| Digoxin                                          | 2372 (32.1%)                  | 2359 (31.6%)                     | 1071 (36.0%)                  | <0.0001 |
| Calcium blocker                                  | 2308 (31.2%)                  | 2315 (31.0%)                     | 921 (30.9%)                   | 0.9498  |
| Lipid-lowering agents                            | 3397 (45.9%)                  | 3416 (45.8%)                     | 1347 (45.3%)                  | 0.8203  |
| Non-steroidal anti-inflammatory agent            | 640 (8.7%)                    | 596 (8.0%)                       | 278 (9.3%)                    | 0.0640  |

**Table 2** Clinical characteristics and medications at baseline according to renal function by cystatin C estimated GFR

| Characteristic                               | >80 mL/min<br>(n = 7545; 51%) | >50–80 mL/min<br>(n = 5272; 35%) | ≤50 mL/min<br>(n = 2067; 14%) | P-value |
|----------------------------------------------|-------------------------------|----------------------------------|-------------------------------|---------|
| Age (mean, SD)                               | 66.9 (9.6)                    | 70.3 (9.1)                       | 73.3 (8.7)                    | <0.0001 |
| Age ≥ 75                                     | 2949 (39.1%)                  | 2116 (40.1%)                     | 770 (37.3%)                   | <0.0001 |
| Female sex                                   | 2609 (34.6%)                  | 1905 (36.1%)                     | 786 (38.0%)                   | <0.0091 |
| Region                                       |                               |                                  |                               |         |
| North America                                | 1727 (22.9)                   | 1277 (24.2%)                     | 565 (27.3%)                   | <0.0001 |
| Latin America                                | 1526 (20.2%)                  | 1029 (19.5%)                     | 397 (19.2%)                   |         |
| Europe                                       | 3098 (41.1%)                  | 2144 (40.7%)                     | 741 (35.8%)                   |         |
| Asian Pacific                                | 1194 (15.8%)                  | 822 (15.6%)                      | 364 (17.6%)                   |         |
| Systolic blood pressure (mean, SD)           | 131.5 (16.0)                  | 131.7 (16.5)                     | 129.7 (17.0)                  | <0.0001 |
| Diastolic blood pressure (mean, SD)          | 80.0 (10.2)                   | 79.1 (10.5)                      | 76.9 (11.1)                   | <0.0001 |
| Weight (mean, SD)                            | 84.3 (20.2)                   | 84.5 (20.9)                      | 82.6 (21.2)                   | 0.0009  |
| Prior myocardial infarction                  | 774 (10.3%)                   | 757 (14.4%)                      | 382 (18.5%)                   | <0.0001 |
| Congestive heart failure                     | 1971 (26.1%)                  | 1771 (33.6%)                     | 865 (41.8%)                   | <0.0001 |
| Prior stroke, TIA, or systemic embolism      | 1344 (17.8%)                  | 1067 (20.2%)                     | 475 (23.0%)                   | <0.0001 |
| Diabetes                                     | 1746 (23.1%)                  | 1319 (25.0%)                     | 615 (29.8%)                   | <0.0001 |
| Hypertension                                 | 6550 (86.8%)                  | 4625 (87.7%)                     | 1853 (89.6%)                  | <0.0001 |
| Prior clinically relevant or spont. bleeding | 1161 (15.4%)                  | 841 (16.0%)                      | 423 (20.5%)                   | <0.0001 |
| History of fall within previous year         |                               |                                  |                               | <0.0001 |
| Type of atrial fibrillation                  |                               |                                  |                               |         |
| Paroxysmal                                   | 1317 (17.5%)                  | 708 (13.4%)                      | 225 (10.9%)                   | <0.0001 |
| Persistent or permanent                      | 6225 (82.5%)                  | 4564 (86.6%)                     | 1842 (89.1%)                  |         |
| Vitamin K antagonist naïve                   | 4135 (54.9%)                  | 2839 (53.9%)                     | 1024 (49.7%)                  | 0.0001  |
| CHADS <sub>2</sub> (mean, SD)                | 1.9 (1.0)                     | 2.2 (1.1)                        | 2.5 (1.2)                     | <0.0001 |
| CHADS <sub>2</sub> score                     |                               |                                  |                               |         |
| 1                                            | 3093 (41.0%)                  | 1561 (29.6%)                     | 400 (19.4%)                   | <0.0001 |
| 2                                            | 2641 (35.0%)                  | 1980 (37.6%)                     | 744 (36.0%)                   |         |
| ≥ 3                                          | 1811 (24.0%)                  | 1731 (32.8%)                     | 923 (44.7%)                   |         |
| Medications at time of randomization         |                               |                                  |                               |         |
| ACE inhibitor or ARB                         | 5215 (69.1%)                  | 3770 (71.5%)                     | 1546 (74.8%)                  | <0.0001 |
| Amiodarone                                   | 892 (11.8%)                   | 599 (11.4%)                      | 220 (10.6%)                   | 0.3073  |
| β-Blocker                                    | 4659 (61.7%)                  | 3388 (64.3%)                     | 1364 (66.0%)                  | 0.0003  |
| Aspirin                                      | 2263 (30.0%)                  | 1620 (30.7%)                     | 716 (34.6%)                   | 0.0003  |
| Clopidogrel                                  | 115 (1.5%)                    | 99 (1.9%)                        | 51 (2.5%)                     | 0.0129  |
| Digoxin                                      | 2256 (29.9%)                  | 1805 (34.2%)                     | 764 (37.0%)                   | <0.0001 |
| Calcium blocker                              | 2265 (30.0%)                  | 1639 (31.1%)                     | 646 (31.3%)                   | 0.3331  |
| Lipid-lowering agents                        | 3347 (44.4%)                  | 2303 (43.7%)                     | 993 (48.0%)                   | 0.0027  |
| Non-steroidal anti-inflammatory agent        | 590 (7.8%)                    | 419 (7.9%)                       | 243 (11.8%)                   | <0.0001 |

## Discussion

### Main findings

The main findings of the trial were that the primary endpoint of stroke or systemic embolism occurred less frequently in patients assigned to apixaban than warfarin, regardless of renal function. Also major bleeding occurred less frequently in the apixaban group, irrespective of renal function. The present analysis

represents the largest experience of anticoagulation therapy in patients with AF and impaired renal function including 7587 patients with an eGFR of >50–80 mL/min and 3017 subjects with an eGFR of ≤50 mL/min. The findings in patients with different degrees of renal dysfunction were consistent with the results of the overall trial. In addition, patients with impaired renal function (≤50 mL/min) seemed to have the greatest reduction in major bleeding with apixaban, when using creatinine-based estimates of GFR such



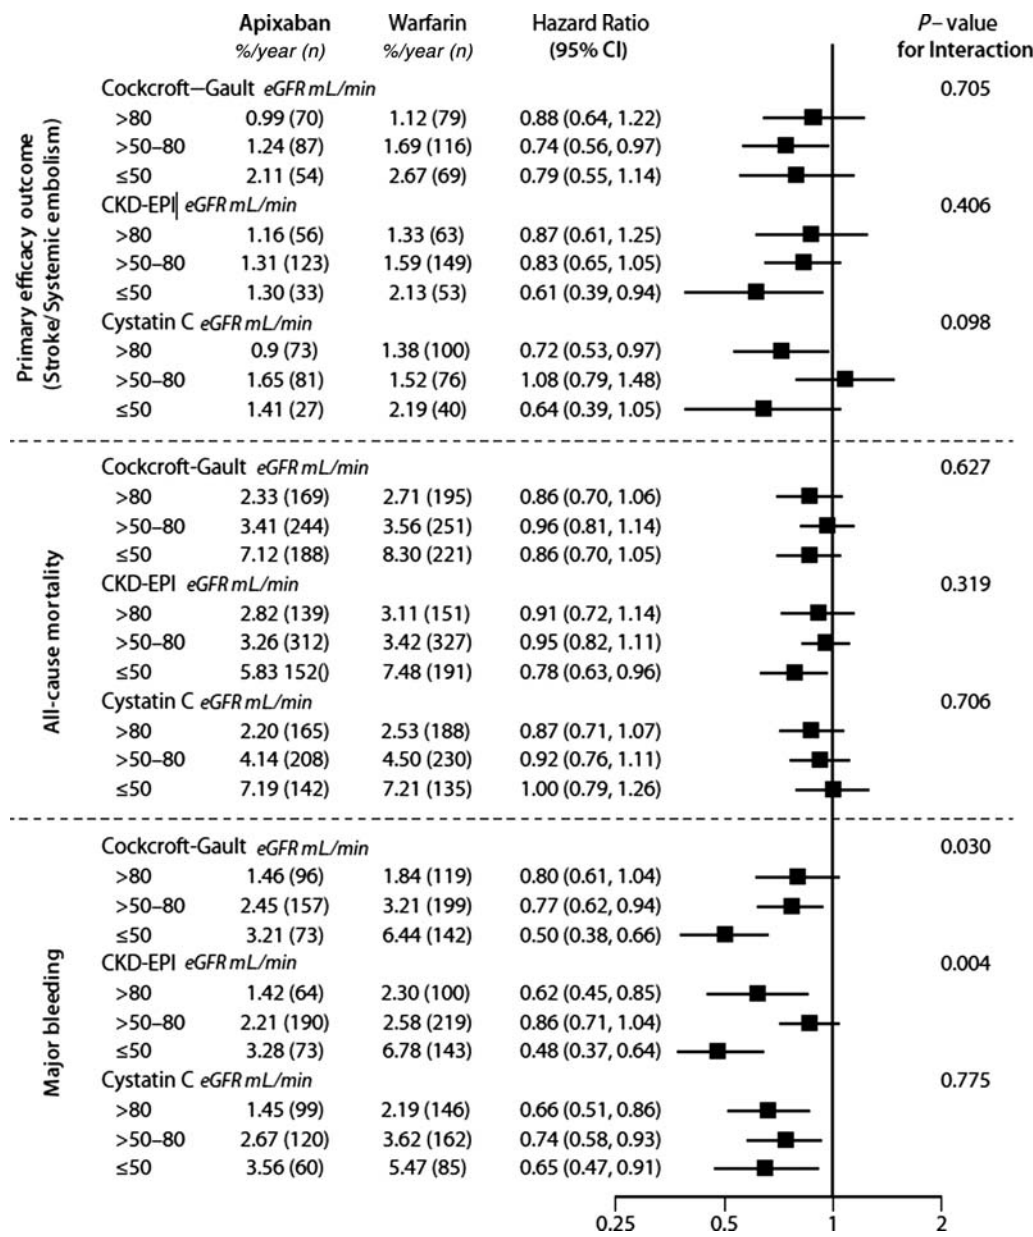

**Figure 1** Forrest plot for effect of apixaban vs. warfarin for outcomes of stroke or systemic embolism, mortality, and major bleed according to renal function estimated with the Cockcroft–Gault, CKD-EPI, and cystatin C. Interaction P-values are based on categorical estimated glomerular filtration rates.

as the widely used Cockcroft–Gault or the newer CKD-EPI equations.

Stroke prevention in patients with renal dysfunction

The incidence of renal impairment increases with age, particularly in patients with cardiovascular co-morbidities. As AF is also a disease of the elderly, AF and renal dysfunction often coexist. Based on the recent results from a large administrative database of 10 908 AF patients, impaired renal function seemed to be associated with a particularly high risk of ischaemic stroke or systemic

embolism.<sup>5</sup> The results from the present study confirm these findings and clearly display the increased stroke rate with decreasing renal function in a large global AF population. Both the annual rates of stroke or systemic embolism and ischaemic strokes were more than doubled in patients with moderate/severe renal impairment when compared with normal renal function. There was no significant interaction between randomized treatment and renal dysfunction for stroke outcomes. Accordingly, with a consistent relative reduction in the rate of stroke or systemic embolism, apixaban provided the largest absolute benefits in patients with renal impairment (Figure 1). It should be noted that the confidence intervals in Figure 2A are not sufficiently narrow to rule out

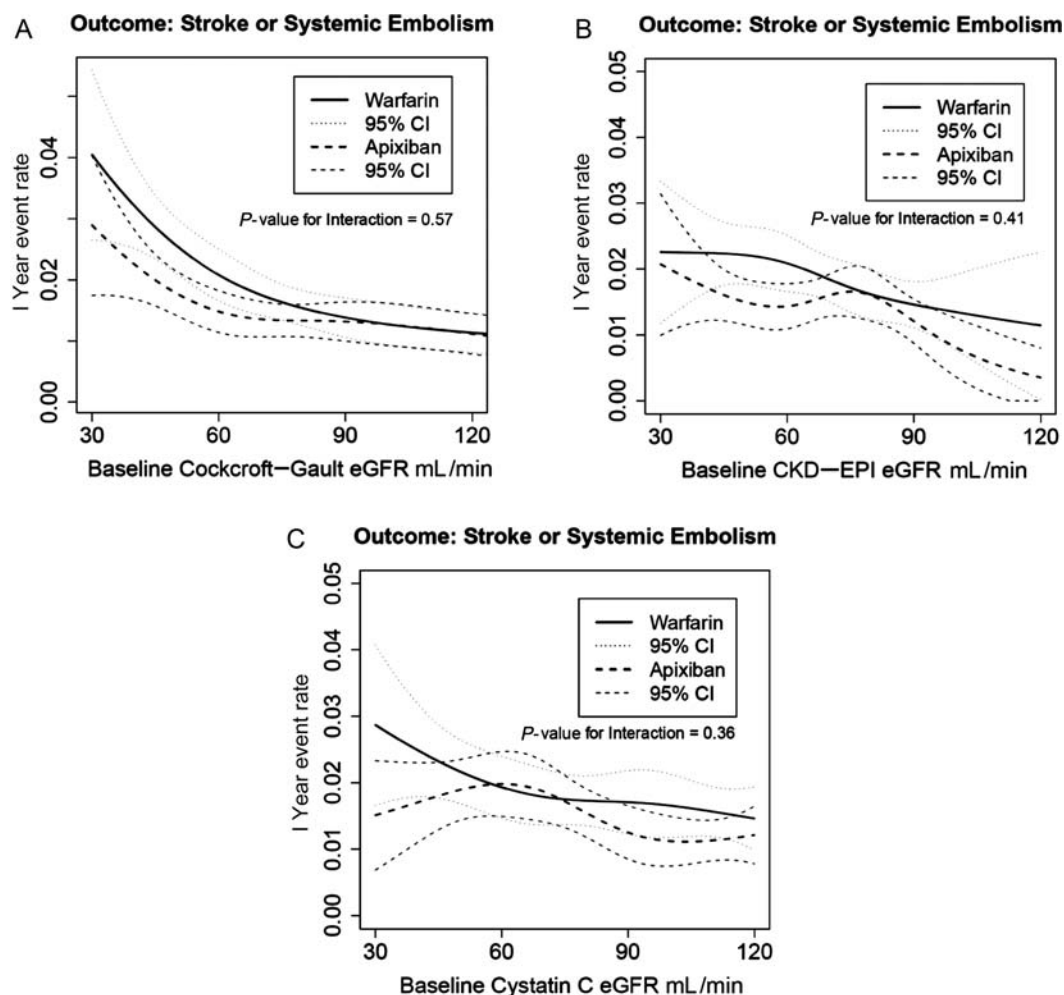

**Figure 2** (A) Apixaban vs. warfarin for stroke or systemic embolism with continuous analysis of estimated renal function with Cockcroft–Gault. (B) Apixaban vs. warfarin for stroke or systemic embolism with continuous analysis of estimated renal function with CKD–EPI. (C) Apixaban vs. warfarin for stroke or systemic embolism with continuous analysis of estimated renal function with cystatin C. All interaction P-values are based on continuous estimated glomerular filtration rates.

a clinically relevant interaction. In our sample, the benefits of apixaban were mainly in those with an eGFR below 90 mL/min. However, this observed heterogeneity was also consistent with chance.

### Renal function and mortality

Atrial fibrillation and impaired renal function have both been demonstrated to be independently associated with increased mortality in various clinical settings.<sup>14–16</sup> This relation remained highly significant in the ARISTOTLE trial. Despite oral anticoagulation and regular follow-up, all-cause mortality remained the most common major outcome event in this AF cohort. The mortality rates increased even further with decreasing renal function and the annual all-cause mortality rate was three-fold higher in patients with moderate/severe renal dysfunction compared with normal renal function. There was no significant interaction between treatment effects and renal dysfunction with respect to all-cause

mortality and accordingly apixaban was more effective than warfarin also for this outcome irrespective of degree of renal impairment (Figure 1).<sup>8</sup>

### Major bleeding in patients with renal dysfunction

Despite this increased risk for AF-associated thrombo-embolism, many patients with renal dysfunction are not receiving oral anticoagulation therapy,<sup>7</sup> mostly because of fear of bleeding with warfarin. In fact, it has been shown that the risk of bleeding associated with warfarin therapy is particularly high in patients with renal dysfunction.<sup>17</sup> The present results verify the increased rates of major bleeding events with decreasing renal function during oral anticoagulation with warfarin treatment in accordance with published reports.<sup>17–19</sup> Our findings show both that the overall rate of major bleeding is lower and also that the increase in the rate of bleeding by renal dysfunction is less with apixaban than warfarin.

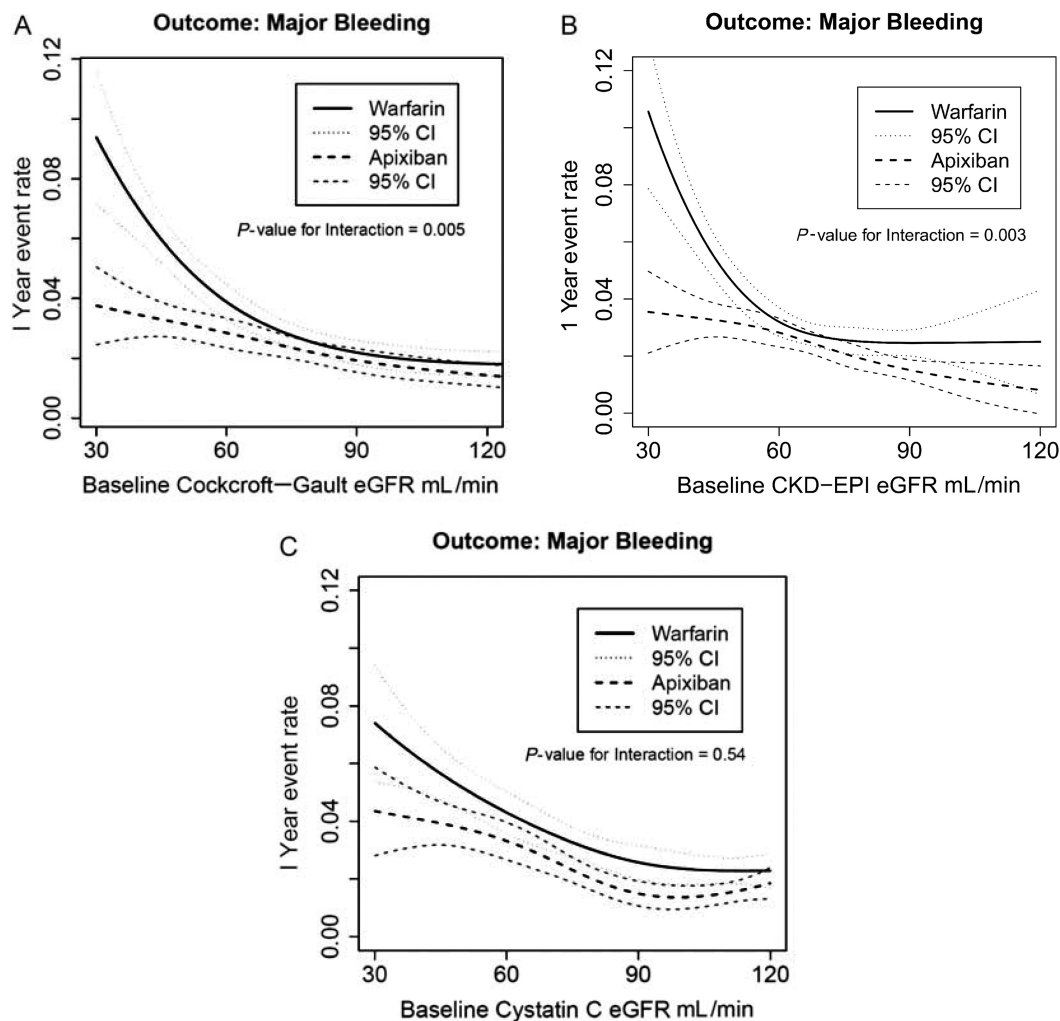

**Figure 3** (A) Apixaban vs. warfarin for major bleed with continuous analysis of estimated renal function with Cockcroft–Gault. (B) Apixaban vs. warfarin for major bleed with continuous analysis of estimated renal function with CKD-EPI. (C) Apixaban vs. warfarin for major bleed with continuous analysis of estimated renal function with cystatin C. All interaction *P*-values are based on continuous estimated glomerular filtration rates.

**Table 3** Sensitivity analyses of apixaban dose and bleeding

| Outcome                     | P-value for interaction between randomized treatment and continuous eGFR (Cockcroft–Gault) |               |               |
|-----------------------------|--------------------------------------------------------------------------------------------|---------------|---------------|
|                             | Main analysis                                                                              | Sensitivity 1 | Sensitivity 2 |
| Stroke or systemic embolism | 0.57                                                                                       | 0.65          | 0.50          |
| Major bleeding              | 0.005                                                                                      | 0.02          | 0.04          |

Sensitivity 1, adjustment for dose (low/standard) by including dose as a covariate, both as a main effect and as an interaction between dose and treatment; sensitivity 2, exclusion of all patients on low dose apixaban (see text for details).

Accordingly, apixaban appears as safer for oral anticoagulation in AF patients across the full range of renal function and especially in those with renal impairment. Specifically, when impairment of renal function was assessed according to creatinine-based estimations, the largest reduction in bleeding complications with apixaban when compared with warfarin was seen in patients with the most pronounced renal impairment defined as eGFR below 50 mL/min.

### Estimated glomerular filtration rate and treatment interaction

The CKD-EPI is a new equation for the estimation of GFR. CKD-EPI was specifically developed to outperform existing creatinine-based GFR estimates, in particular preserving a high accuracy in a chronic kidney disease population and simultaneously improving accuracy in the range of normal to mild GFR



impairments.<sup>10</sup> Cystatin C is a small protein, synthesized at a constant rate in all nucleated cells.<sup>20</sup> It is freely filtered by the glomerulus, does not return to the blood flow, is minimally influenced by disease states, and is therefore believed to be a better endogenous marker of eGFR than creatinine.<sup>11</sup> Cystatin C has been proposed as a more reliable marker of renal function than serum creatinine,<sup>11</sup> in particular for the detection of small reductions in eGFR.<sup>21</sup>

The Cockcroft–Gault and CKD-EPI are, as described, both serum creatinine-based estimations of GFR. With cystatin C, a higher proportion of patients were classified as having normal renal function in the present study, 51%, compared with 42 and 29% for Cockcroft–Gault and CKD-EPI, respectively. These differences may originate from disparities in the glomerular filtration of the biomarker or within the equations used, as both the Cockcroft–Gault and CKD-EPI take age and gender into account while cystatin C does not. This may explain the discrepancies between the treatment interaction analyses for major bleeding regarding Cockcroft–Gault and CKD-EPI compared with cystatin C. Although cystatin C in several studies has been described as a more reliable marker of renal function, it should be noted that in the elderly population, GFR estimated with cystatin C is not well described. In the few studies available, cystatin C has been described to yield a significantly lower prevalence of chronic kidney disease compared with creatinine-based estimates.<sup>22</sup> Since actual eGFR was not measured in the ARISTOTLE trial and the direct comparison among different methods to estimate GFR was not the main objective of our study, no general assumptions can be made in regard neither to preferable methods nor regarding superiority for estimating true eGFR with either the Cockcroft–Gault, CKD-EPI, or cystatin C equations in this population. Nonetheless, our findings may add to further improvement of tailoring oral anticoagulant treatment in AF patients by estimating renal function with Cockcroft–Gault or CKD-EPI.

## Conclusions

The high risk of both stroke and of major bleeding in AF patients with impaired renal function defines an important group with a need for therapy that current treatments may not adequately address. When compared with warfarin, apixaban treatment reduced the rate of stroke, death, and major bleeding, regardless of renal function. Patients with impaired renal function seemed to have the greatest reduction in major bleeding with apixaban, when using creatinine-based estimates of GFR. Our findings suggest that apixaban may be particularly suited to address the unmet need for a more effective and safe stroke prevention in patients with AF and renal dysfunction.

## Supplementary material

Supplementary material is available at *European Heart Journal* online.

## Funding

The ARISTOTLE trial was funded by Bristol-Myers Squibb and Pfizer. Duke Clinical Research Institute received funding from BMS for the analysis and manuscript preparation performed by L.T.

**Conflict of interest:** S.H.H. reports receiving consulting fees from Sanofi-aventis, Cardiome, BMS, BI, Johnson & Johnson, and Pfizer, research grants from Sanofi-aventis and St Jude Medical; and lecture fees from Sanofi-aventis, St Jude Medical, Pfizer, BMS, Medtronic, and BI. Z.H. reports receiving lecture fees and an institutional research grant from Boehringer Ingelheim. J.A. reports receiving lecture and consulting fees from Bristol-Myers Squibb and Pfizer. J.H.A. reports receiving grants from Bristol-Myers Squibb, Merck/Schering-Plough, and Regado Biosciences; travel support from Bristol-Myers Squibb; and consulting fees from Bristol-Myers Squibb, Pfizer, Merck/Schering-Plough, AstraZeneca, Boehringer Ingelheim, Ortho-McNeil-Janssen Pharmaceuticals, PolyMedix, Regado Biosciences, Bayer, and Daiichi-Sankyo. M.H. is an employee of Bristol-Myers Squibb and receiving stock as a part of his compensation. M.K. reports receiving travel support from Bristol-Myers Squibb. F.L. reports receiving grant and travel support from Bristol-Myers Squibb/Pfizer. R.D.L. reports receiving grants from Bristol-Myers Squibb, AstraZeneca, Boehringer Ingelheim, and DaiichiSankyo and consulting fees from Bristol-Myers Squibb. J.L.-S. reports receiving grants from Bristol-Myers Squibb, Boehringer Ingelheim, and Bayer and consulting fees from Boehringer Ingelheim. C.B.G. reports receiving grants from Bristol-Myers Squibb, Boehringer Ingelheim, Astellas, AstraZeneca, GlaxoSmithKline, Medtronic foundation, Merck, Sanofi-aventis, and the Medicine's Company; consulting fees from Bristol-Myers Squibb, Pfizer, Boehringer Ingelheim, AstraZeneca, Lilly, GlaxoSmithKline, Hoffman-La Roche, Novartis, Otsuka, Sanofi-aventis, and the Medicine's Company; and travel support from Pfizer, Novartis, Otsuka, and Hoffmann-La Roche. L.W. reports receiving research grants from AstraZeneca, Merck/Schering-Plough, Boehringer Ingelheim, Bristol-Myers Squibb/Pfizer, GlaxoSmithKline; being a consultant for Merck/Schering-Plough, Regado Biosciences, Evolva, Portola, C.S.L. Behring, Athera Biotechnologies, Boehringer Ingelheim, AstraZeneca, GlaxoSmithKline, and Bristol-Myers Squibb/Pfizer; lecture fees from AstraZeneca, Boehringer Ingelheim, Bristol-Myers Squibb/Pfizer, GlaxoSmithKline, Schering-Plough; and honoraria from Boehringer Ingelheim, AstraZeneca, Bristol-Myers Squibb/Pfizer, GlaxoSmithKline, and Schering-Plough/Merck.

## References

1. Coresh J, Selvin E, Stevens LA, Manzi J, Kusek JW, Eggers P, Van Lente F, Levey AS. Prevalence of chronic kidney disease in the United States. *J Am Med Assoc* 2007; **298**:2038–2047.
2. Soliman EZ, Prineas RJ, Go AS, Xie D, Lash JP, Rahman M, Ojo A, Teal VL, Jensvold NG, Robinson NL, Dries DL, Bazzano L, Mohler ER, Wright JT, Feldman HI. Chronic kidney disease and prevalent atrial fibrillation: the Chronic Renal Insufficiency Cohort (CRIC). *Am Heart J* 2010; **159**: 1102–1107.
3. Alonso A, Lopez FL, Matsushita K, Loehr LR, Agarwal SK, Chen LY, Soliman EZ, Astor BC, Coresh J. Chronic kidney disease is associated with the incidence of atrial fibrillation: the Atherosclerosis Risk in Communities (ARIC) study. *Circulation* 2011; **123**:2946–2953.
4. Seliger SL, Gillen DL, Longstreth WT Jr, Kestenbaum B, Stehman-Breen CO. Elevated risk of stroke among patients with end-stage renal disease. *Kidney Int* 2003; **64**:603–609.
5. Go AS, Fang MC, Udaltsova N, Chang Y, Pomernacki NK, Borowsky L, Singer DE. Impact of proteinuria and glomerular filtration rate on risk of thromboembolism in atrial fibrillation: the anticoagulation and risk factors in atrial fibrillation (ATRIA) study. *Circulation* 2009; **119**:1363–1369.
6. Piccini JP, Hernandez AF, Zhao X, Patel MR, Lewis WR, Peterson ED, Fonarow GC. Quality of care for atrial fibrillation among patients hospitalized for heart failure. *J Am Coll Cardiol* 2009; **54**:1280–1289.
7. Marinigh R, Lane DA, Lip GYH. Severe renal impairment and stroke prevention in atrial fibrillation. Implications for thromboprophylaxis and bleeding risk. *J Am Coll Cardiol* 2011; **57**:1339–1348.
8. Granger CB, Alexander JH, McMurray JJ, Lopes RD, Hylek EM, Hanna M, Al-Khalidi HR, Ansell J, Atar D, Avezum A, Bahit MC, Diaz R, Easton JD, Ezekowitz JA, Flaker G, Garcia D, Gerdal M, Gersh BJ, Golitsyn S, Goto S,

- Hermosillo AG, Hohnloser SH, Horowitz J, Mohan P, Jansky P, Lewis BS, Lopez-Sendon JL, Pais P, Parkhomenko A, Verheugt FW, Zhu J, Wallentin L. Apixaban versus warfarin in patients with atrial fibrillation. *N Engl J Med* 2011;**365**: 981–992.
9. Lopes RD, Alexander JH, Al-Khatib SM, Ansell J, Diaz R, Easton JD, Gersh BJ, Granger CB, Hanna M, Horowitz J, Hylek EM, McMurray JJ, Verheugt FW, Wallentin L. Apixaban for reduction in stroke and other thromboembolic events in atrial fibrillation (ARISTOTLE) trial: design and rationale. *Am Heart J* 2010;**159**:331–339.
10. Levey AS, Stevens LA, Schmid CH, Zhang YL, Castro AF 3rd, Feldman HI, Kusek JW, Eggers P, Van Lente F, Greene T, Coresh J. A new equation to estimate glomerular filtration rate. *Ann Intern Med* 2009;**150**:604–612.
11. Laterza OF, Price CP, Scott MG. Cystatin C: an improved estimator of glomerular filtration rate? *Clin Chem* 2002;**48**:699–707.
12. Flodin M, Jonsson AS, Hansson LO, Danielsson LA, Larsson A. Evaluation of Gentian cystatin C reagent on Abbott Ci8200 and calculation of glomerular filtration rate expressed in mL/min/1.73 m<sup>2</sup> from the cystatin C values in mg/L. *Scand J Clin Lab Invest* 2007;**67**:560–567.
13. Johnston N, Jernberg T, Lindahl B, Lindback J, Stridsberg M, Larsson A, Venge P, Wallentin L. Biochemical indicators of cardiac and renal function in a healthy elderly population. *Clin Biochem* 2004;**37**:210–216.
14. Al Suwaidi J, Reddan DN, Williams K, Pieper KS, Harrington RA, Califf RM, Granger CB, Ohman EM, Holmes DR Jr. Prognostic implications of abnormalities in renal function in patients with acute coronary syndromes. *Circulation* 2002;**106**: 974–980.
15. Benjamin EJ, Wolf PA, D'Agostino RB, Silbershatz H, Kannel WB, Levy D. Impact of atrial fibrillation on the risk of death: the Framingham Heart Study. *Circulation* 1998;**98**:946–952.
16. Go AS, Chertow GM, Fan D, McCulloch CE, Hsu CY. Chronic kidney disease and the risks of death, cardiovascular events, and hospitalization. *N Engl J Med* 2004; **351**:1296–1305.
17. Reinecke H, Brand E, Mesters R, Schabitz WR, Fisher M, Pavenstadt H, Breithardt G. Dilemmas in the management of atrial fibrillation in chronic kidney disease. *J Am Soc Nephrol* 2009;**20**:705–711.
18. Pisters R, Lane DA, Nieuwlaat R, de Vos CB, Crijns HJ, Lip GY. A novel user-friendly score (HAS-BLED) to assess one-year risk of major bleeding in atrial fibrillation patients: The Euro Heart Survey. *Chest* 2010;**138**:1093–1100.
19. Fox KAA, Piccini JP, Wojdyla D, Becker RC, Halperin JL, Nessel CC, Paolini JF, Hankey GJ, Mahaffey KW, Patel MR, Singer DE, Califf RM. Prevention of stroke and systemic embolism with rivaroxaban compared with warfarin in patients with non-valvular atrial fibrillation and moderate renal impairment. *Eur Heart J* 2011;**32**:2387–2394.
20. Abrahamson M, Olafsson I, Palsdottir A, Ulvsback M, Lundwall A, Jansson O, Grubb A. Structure and expression of the human cystatin C gene. *Biochem J* 1990;**268**:287–294.
21. Newman DJ, Thakkar H, Edwards RG, Wilkie M, White T, Grubb AO, Price CP. Serum cystatin C measured by automated immunoassay: a more sensitive marker of changes in GFR than serum creatinine. *Kidney Int* 1995;**47**:312–318.
22. Shastri S, Tighiouart H, Katz R, Rifkin DE, Fried LF, Shlipak MG, Newman AB, Sarnak MJ. Chronic kidney disease in octogenarians. *Clin J Am Soc Nephrol* 2011; **6**:1410–1417.
